# Supplementary material for: Vagus Nerve Stimulation Alleviates Hepatic Ischemia and Reperfusion Injury by Regulating Glutathione Production and Transformation
Source: PubMed Central journal article supplement (PMC6996675; doi:10.1155/2020/1079129), 2020-01-21
Supplement: 1079129.f1.pdf [file 1079129.f1.pdf]

**A**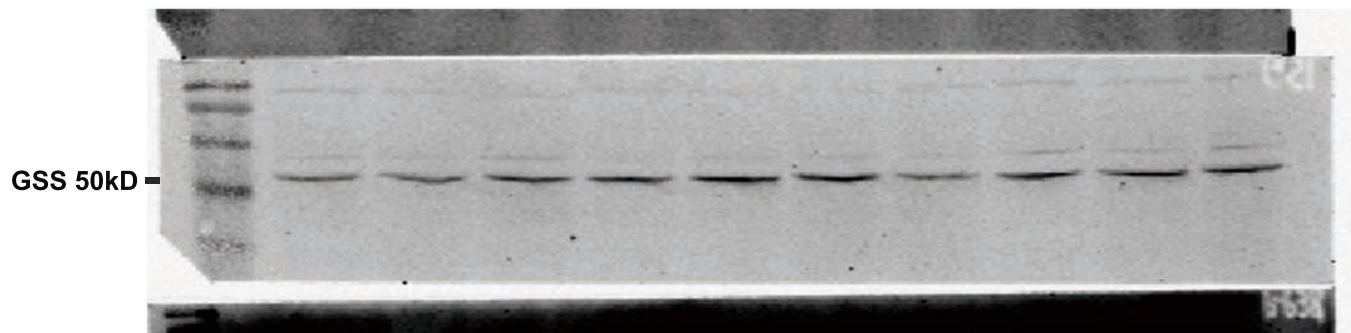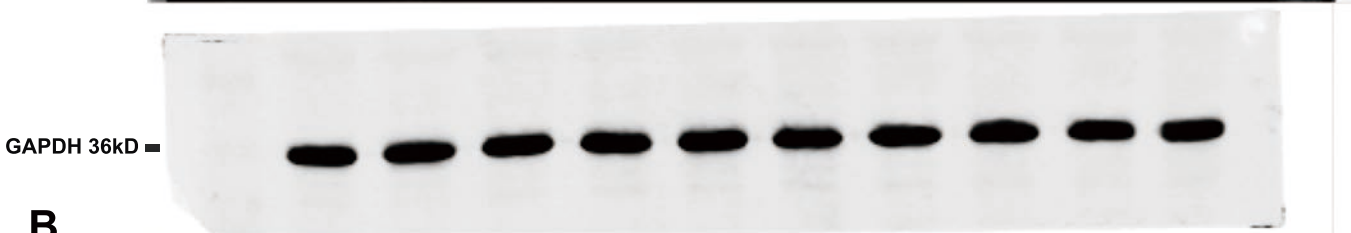**B**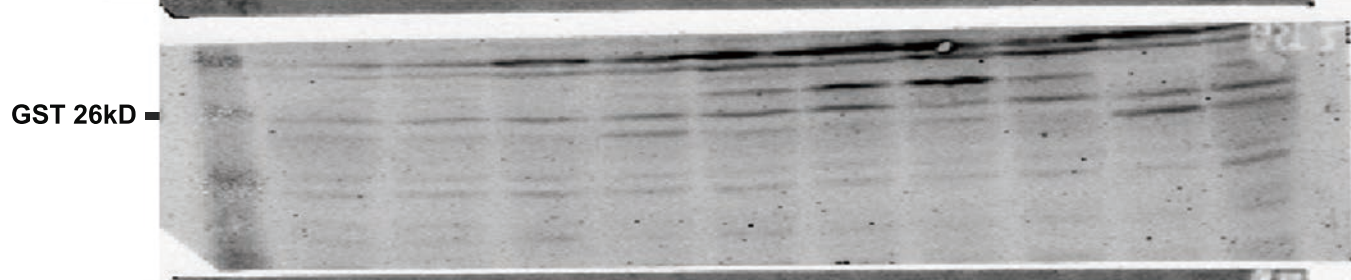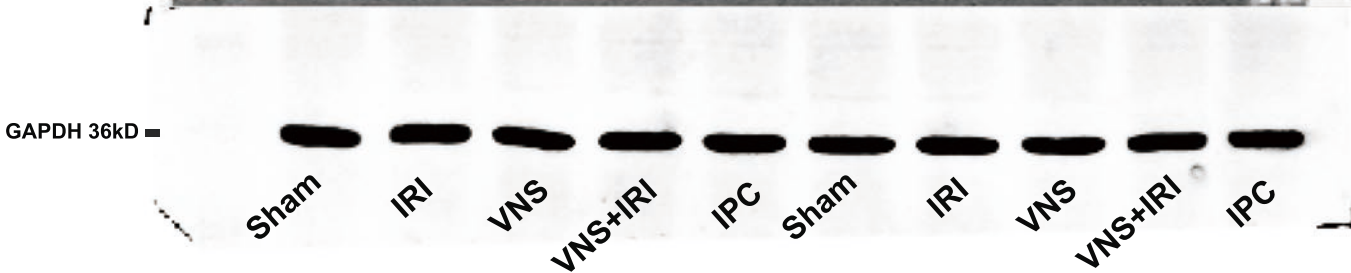

Sham

IRI

VNS

VNS+IRI

IPC

Sham

IRI

VNS

VNS+IRI

IPC

Figure S1. The complete western blots of glutathione synthetase and glutathione S-transferase proteins. (A) Glutathione synthetase. (B) Glutathione S-transferase.
